# Supplementary material
Source: PubMed Central journal article supplement (PMC4465126)
Supplement: NIHMS687604-supplement-Permission_Fig_1.pdf [file NIHMS687604-supplement-Permission_Fig_1.pdf]

**A)** REF 21 (Figure 2)

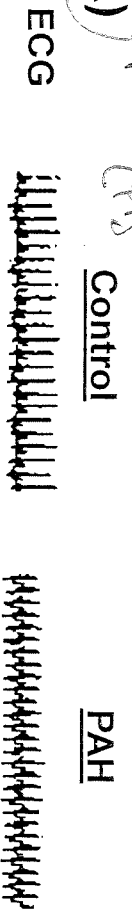

HR (bpm) 72  
 Mean BP (mm Hg) 90

84  
 83

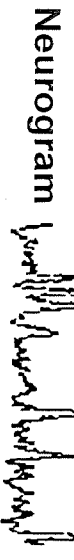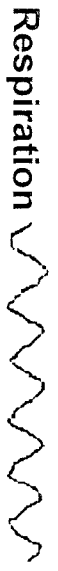

10 s

**C)** REF 22 (Figure 3)

Moderate PH Severe PH

PA<sub>m</sub> (mmHg) 35

57

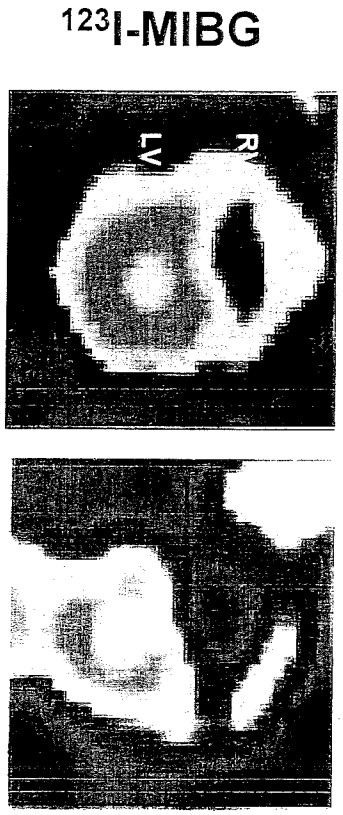

**B)** REF 21 (Figure 3)

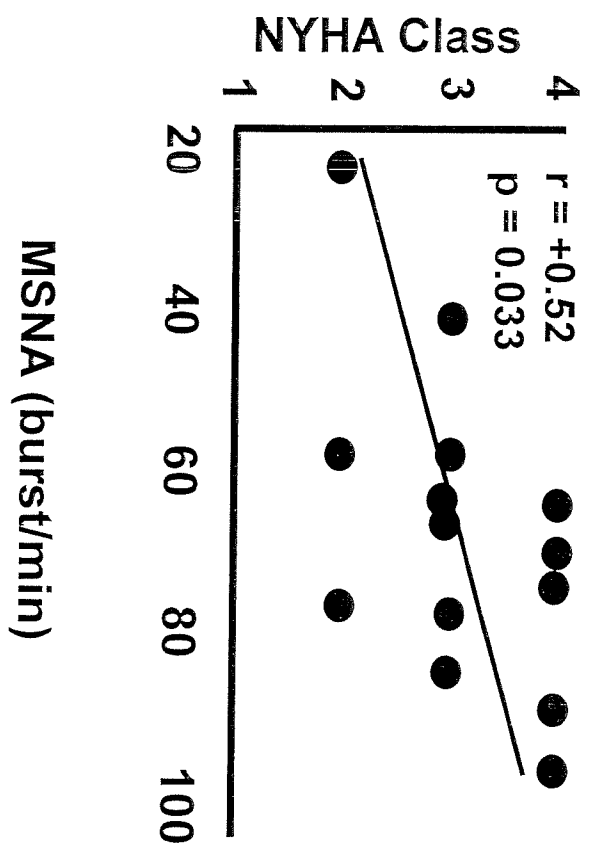

21  
 22

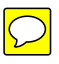

Figure 1

**RE: SNMMI Publication Data Reprint Permission Request**

Sumimoto Mark [msumimoto@snmmi.org] on behalf of Permissions [permissions@snm.org]

**Sent:** Monday, September 08, 2014 9:39 AM

**To:** Maron, Bradley A.,M.D.; Leopold, Jane A.,M.D.

Dear Bradley A. Maron, Jane A. Leopold,

JNM has an open permission policy allowing the use of original figures and tables published in JNM in other journals. In these cases, formal permission is not required as long as proper credit is given to JNM as follows: This research was originally published in JNM. Author(s). Title. J Nucl Med. Year;vol:pp-pp. © by the Society of Nuclear Medicine and Molecular Imaging, Inc. This policy is posted online at: <http://jnm.snmjournals.org/site/misc/permission.xhtml>.

Materials credited to outside sources are not original. In this case, the original rightsholders should be contacted for reprint permission. Copyright to material published by presenters at SNMMI Annual Meetings is retained by the original authors.

To reprint JNM material in other types of publications, please complete the online reprint permission form at: <http://www.snmmi.org/Applications/Forms/FormDisplay.aspx?FormID=23215&navItemNumber=684>

Mark Sumimoto  
Editorial Project Manager  
SNMMI | The Society of Nuclear Medicine and Molecular Imaging  
phone: 703.652.6777 | fax: 703.708.9018  
email: msumimoto@snmmi.org  
[www.snmmi.org](http://www.snmmi.org)

Introducing the new [www.snmmi.org](http://www.snmmi.org): Redesigned with YOU in mind.

We've got Apps! Download the JNM/JNMT and Annual Meeting Apps today.

-----Original Message-----

From: Internet Services  
Sent: Friday, September 05, 2014 12:40 PM  
To: Permissions  
Subject: SNMMI Publication Data Reprint Permission Request

The following Request for Reprint of Publications Data was received:

Requestor Information . . .  
Name: Bradley A. Maron, Jane A. Leopold  
Company: Brigham and Women's Hospital, and Harvard Medical School  
Address 1: 77 Ave. Louis Pasteur  
Address 2:  
City: Boston  
State/Province: MA  
ZIP/Postal Code: 02115  
Phone: 617-525-4856  
Fax: 617-525-4830  
Email: bmaron@partners.org; jleopold@partners.org

Publication in Which You Would Like Permission to Reprint . . .  
Authors/Editors: Maron, B.A., Leopold, Jane A.  
Title of Publication: journal  
Article Title (if applicable): Emerging Concepts in the Molecular Basis of Pulmonary Arterial Hypertension (PAH): Part II: Neurohormonal Signaling Contributes to the .....

Projected Date of Publication: September 29 2014  
Publisher: LWW  
Place of Publication:  
Purpose of Publication:

Material You Would Like To Reprint . . .

Authors: Morimitsu T, Miyahara Y, et al.

Title of Publication: J Nucl Med

Article Title: Iodine-123-metaiodobenzylguanidine myocardial imaging in patients with RV pressure overload

Year: 1996

Volume: 37

Issue Number: 8

Page Numbers of Article: 1343-1346

Figure or Table Number(s): A portion of Figure 3

Page Numbers of Material in Question: 1344

Additional Information:

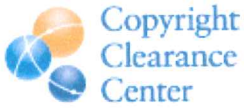

Copyright  
Clearance  
Center **RightsLink®**  
222 Rosewood Drive, Danvers, MA 01923 USA

# INVOICE

**Invoice No:**  
**Invoice Date:**  
**Account No:**  
**Terms:**  
**CCC Federal ID:**

RLNK501395773  
05/Sep/2014  
3000109271  
Due Upon Receipt  
13-2922432

Stephanie C. Tribuna  
Brigham & Women's Hospital  
77 Avenue Louis Pasteur, Rm 630  
Boston, MA 02115  
United States

**To pay by check (other options below):** Make payable to Copyright Clearance Center, reference your invoice number RLNK501395773 and mail to:

Copyright Clearance Center  
P.O. Box 843006  
Boston, MA 02284-3006 USA

**Thank you for placing an order with Wolters Kluwer Health.**  
If payment has been submitted, please disregard this notice.

**License No:** 3462580325427  
**License Date:** 05/Sep/2014  
**Order Reference No (PO No):** Fig 1 Circ Sept 2014  
**Customer Reference No:** Fig 1A,B Circ Sept 2014

|                                     |                                                                                                            |  |
|-------------------------------------|------------------------------------------------------------------------------------------------------------|--|
| <b>License Type:</b>                | Journal/Magazine                                                                                           |  |
| <b>Publication:</b>                 | Circulation                                                                                                |  |
| <b>Identifier of Original Work:</b> | 10.1161/01.CIR.0000140724.90898.D3                                                                         |  |
| <b>Title:</b>                       | Increased Sympathetic Nerve Activity in Pulmonary Artery Hypertension                                      |  |
| <b>Author:</b>                      | Sonia Velez-Roa, Agnieszka Ciarka, Boutaina Najem, Jean-Luc Vachieri, Robert Naeije, Philippe van de Borne |  |
| <b>Order Amount:</b>                | 230.00 USD                                                                                                 |  |
| <b>Sub Total:</b>                   | <b>230.00 USD</b>                                                                                          |  |
| <b>Tax:</b>                         | <b>0.00 USD</b>                                                                                            |  |
| <b>Total Amount Due:</b>            | <b>230.00 USD</b>                                                                                          |  |

If you have any questions about this invoice, please email us at [customercare@copyright.com](mailto:customercare@copyright.com) or call us at +1-855-239-3415/+1-978-646-2777

# Payment Instructions

Please issue payment in the currency denoted upon the invoice

## Pay by Check

Checks should be made payable to Copyright Clearance Center, referencing your ACCOUNT NUMBER and INVOICE NUMBER(S).

Please send your check to:

**Standard Mail Delivery**  
Copyright Clearance Center Inc.  
P.O. Box 843006  
Boston, MA 02284-3006 USA

**Overnight Delivery**  
Eastern Bank  
195 Market Street  
Lockbox Services-843006  
Lynn, MA 01901 USA

## Pay by Credit Card

Please visit the [Manage Account](#) tab at [www.copyright.com](http://www.copyright.com) where you can view your unpaid invoices.

## Pay by Bank Transfer

To pay your invoice(s) by bank transfer, please include your account number and/or your invoice number(s). If you are paying multiple invoices, please email your remittance advice to [receivables@copyright.com](mailto:receivables@copyright.com).

**If sending a wire FROM WITHIN the United States, please use the following information:**

Eastern Bank  
265 Franklin Street  
Boston MA 02110 USA  
617-897-1056

Checking Account #600557615  
Bank ID # or ABA Routing #011301798

**IN REFERENCE/PAYMENTS DETAILS FIELD:**  
Further Credit to Copyright Clearance Center ~ Account #600557615

**If sending a wire FROM OUTSIDE of the United States, please see below for banking instructions by currency type.**

③ **USD-\$ JP Morgan Chase Bank NA, New York, NY**  
SWIFT: CHASUS33

**FOR CREDIT TO ACCOUNT OF BENEFICIARY'S BANK:**  
A/C No. 136071280  
Eastern Bank  
SWIFT: EASRUS3B

**REFERENCE:**  
For further credit to **Copyright Clearance Center Inc.** and **600557615**

**NOTE: Payment must be made in the same currency as displayed on the original invoice.**

|                                  |                                                         |                                                          |                                                                        |                                                                                   |
|----------------------------------|---------------------------------------------------------|----------------------------------------------------------|------------------------------------------------------------------------|-----------------------------------------------------------------------------------|
| <b>Bank Address Information:</b> | Eastern Bank<br>265 Franklin St<br>Boston, MA 02110 USA | PNC Bank NA<br>500 First Ave<br>Pittsburgh, PA 15219 USA | Bank of Nova Scotia<br>720 King Street West<br>Toronto, MV5 2T3 Canada | Citibank Frankfurt<br>Neue Mainzer Strasse 75<br>60311 Frankfurt am Main, Germany |
|----------------------------------|---------------------------------------------------------|----------------------------------------------------------|------------------------------------------------------------------------|-----------------------------------------------------------------------------------|

If you have any questions about this invoice, please email us at [customercare@copyright.com](mailto:customercare@copyright.com) or call us at +1-855-239-3415/+1-978-646-2777
