# Supplementary material
Source: PubMed Central journal article supplement (PMC4465126)
Supplement: NIHMS687604-supplement-Permission_Fig_3.pdf [file NIHMS687604-supplement-Permission_Fig_3.pdf]

16  
REFERENCE  
(Figure 6)

16  
REFERENCE  
(Figure 6)

(A)

(B)

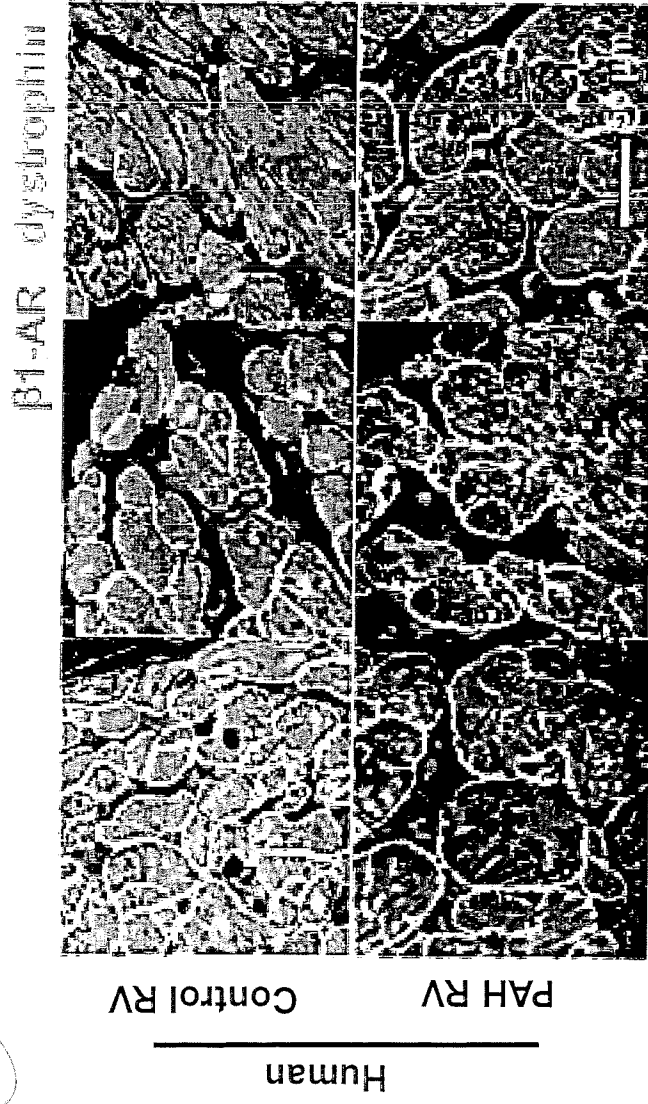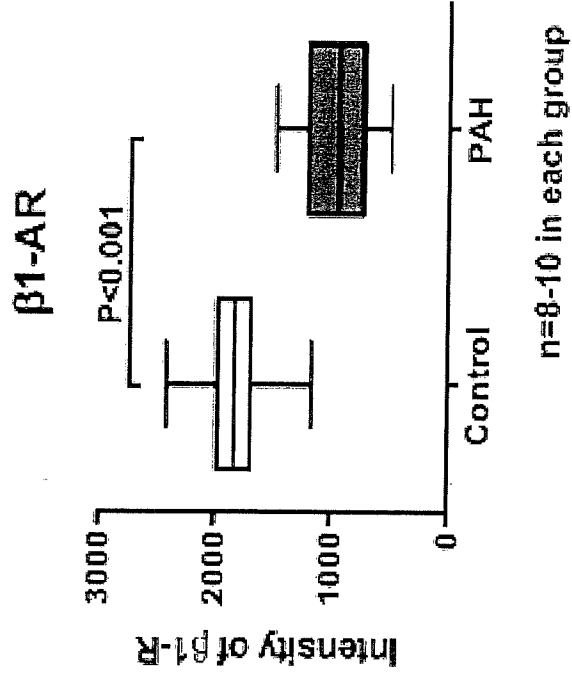

16

Figure 3

# INVOICE

**Invoice No:**  
**Invoice Date:**  
**Account No:**  
**Terms:**  
**CCC Federal ID:**

RLNK501395795  
05/Sep/2014  
3000109271  
Due Upon Receipt  
13-2922432

Stephanie C. Tribuna  
Brigham & Women's Hospital  
77 Avenue Louis Pasteur, Rm 630  
Boston, MA 02115  
United States

**To pay by check (other options below):** Make payable to Copyright Clearance Center, reference your invoice number RLNK501395795 and mail to:

Copyright Clearance Center  
P.O. Box 843006  
Boston, MA 02284-3006 USA

**Thank you for placing an order with Wolters Kluwer Health.**  
If payment has been submitted, please disregard this notice.

**License No:** 3462600521704  
**License Date:** 05/Sep/2014  
**Order Reference No (PO No):** Fig 3 Maron Leopold Circ 2014  
**Customer Reference No:** Fig 3 Maron Leopold Circ 2014

**License Type:** Journal/Magazine  
**Publication:** Circulation  
**Identifier of Original Work:** 10.1161/CIRCULATIONAHA.112.109868  
**Title:** GRK2-Mediated Inhibition of Adrenergic and Dopaminergic Signaling in Right Ventricular Hypertrophy: Therapeutic Implications in Pulmonary Hypertension  
**Author:** Lin Piao, Yong-Hu Fang, Kishan S. Parikh, John J. Ryan, Karen M. D'Souza, Tiju Theccanat, Peter T. Toth, Jennifer Pogoriler, Jonathan Paul, Burns C. Blaxall, Shahab A. Akhter, Stephen L. Archer  
**Order Amount:** 115.00 USD

**Sub Total:** 115.00 USD  
**Tax:** 0.00 USD  
**Total Amount Due:** 115.00 USD

# Payment Instructions

Please issue payment in the currency denoted upon the invoice

## Pay by Check

Checks should be made payable to Copyright Clearance Center, referencing your ACCOUNT NUMBER and INVOICE NUMBER(S).

Please send your check to:

**Standard Mail Delivery**  
Copyright Clearance Center Inc.  
P.O. Box 843006  
Boston, MA 02284-3006 USA

**Overnight Delivery**  
Eastern Bank  
195 Market Street  
Lockbox Services-843006  
Lynn, MA 01901 USA

## Pay by Credit Card

Please visit the [Manage Account](#) tab at [www.copyright.com](http://www.copyright.com) where you can view your unpaid invoices.

## Pay by Bank Transfer

To pay your invoice(s) by bank transfer, please include your account number and/or your invoice number(s). If you are paying multiple invoices, please email your remittance advice to [receivables@copyright.com](mailto:receivables@copyright.com).

**If sending a wire FROM WITHIN the United States, please use the following information:**

Eastern Bank  
265 Franklin Street  
Boston MA 02110 USA  
617-897-1056

Checking Account #600557615  
Bank ID # or ABA Routing #011301798

**IN REFERENCE/PAYMENTS DETAILS FIELD:**  
Further Credit to Copyright Clearance Center ~ Account #600557615

**If sending a wire FROM OUTSIDE of the United States, please see below for banking instructions by currency type.**

 **USD-\$ JP Morgan Chase Bank NA, New York, NY**  
SWIFT: CHASUS33

**FOR CREDIT TO ACCOUNT OF BENEFICIARY'S BANK:**  
A/C No. 136071280  
Eastern Bank  
SWIFT: EASRUS3B

**REFERENCE:**  
For further credit to **Copyright Clearance Center Inc.** and **600557615**

**NOTE: Payment must be made in the same currency as displayed on the original invoice.**

|                                  |                                                         |                                                          |                                                                        |                                                                                   |
|----------------------------------|---------------------------------------------------------|----------------------------------------------------------|------------------------------------------------------------------------|-----------------------------------------------------------------------------------|
| <b>Bank Address Information:</b> | Eastern Bank<br>265 Franklin St<br>Boston, MA 02110 USA | PNC Bank NA<br>500 First Ave<br>Pittsburgh, PA 15219 USA | Bank of Nova Scotia<br>720 King Street West<br>Toronto, MV5 2T3 Canada | Citibank Frankfurt<br>Neue Mainzer Strasse 75<br>60311 Frankfurt am Main, Germany |
|----------------------------------|---------------------------------------------------------|----------------------------------------------------------|------------------------------------------------------------------------|-----------------------------------------------------------------------------------|

If you have any questions about this invoice, please email us at [customercare@copyright.com](mailto:customercare@copyright.com) or call us at +1-855-239-3415/+1-978-646-2777
