# Supplementary material
Source: PubMed Central journal article supplement (PMC4465126)
Supplement: NIHMS687604-supplement-Permission_Fig_6.pdf [file NIHMS687604-supplement-Permission_Fig_6.pdf]

REFERENCE 60  
(Figure 3)

A)

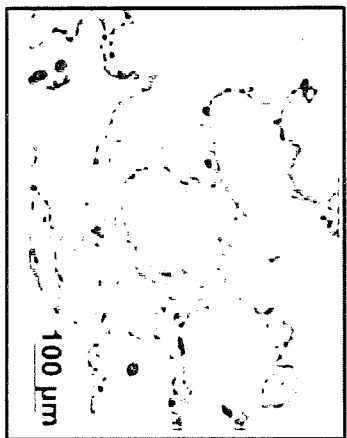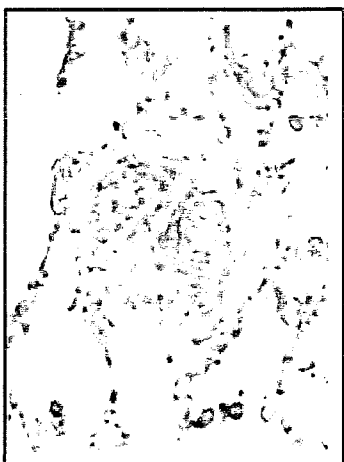

56

B) REFERENCE 60  
(Figure 6)

Estimated RV systolic pressure

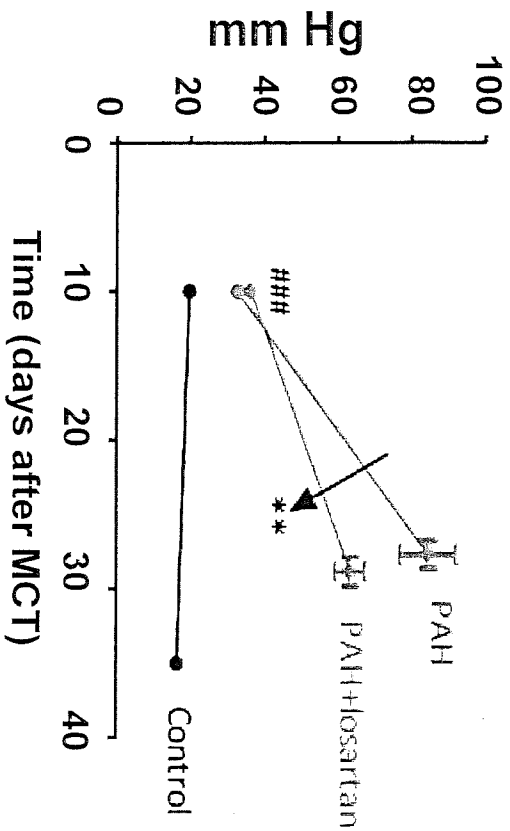

Pulmonary vascular resistance

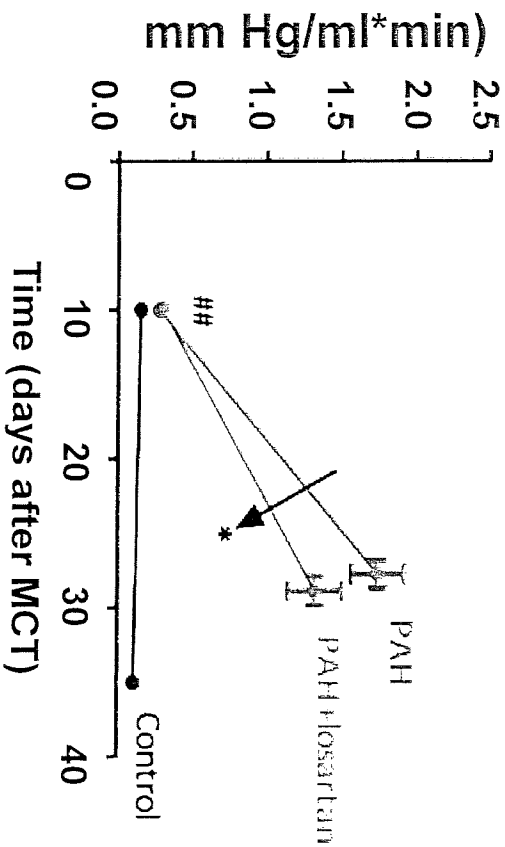

Figure 6

**RE: Permission request**

Lan Vay [lvay@thoracic.org] on behalf of ATS Permission Requests [permissions@thoracic.org]

**Sent:** Thursday, September 11, 2014 11:42 AM

**To:** Tribuna, Stephanie C.

**Cc:** Maron, Bradley A.,M.D.; Leopold, Jane A.,M.D.

Hello Stephanie,

Your payment has been received and fully processed and your request is now formally granted.

Please note that the following wording must appear with the republished material:

Reprinted with permission of the American Thoracic Society. Copyright © 2014 American Thoracic Society.

Cite: Author(s)/Year/Title/Journal Title/Volume/Pages.

Official Journal of the American Thoracic Society.

Best,

**Lan Vay**

Journal Program Coordinator

American Thoracic Society

25 Broadway, 18th Floor

New York, NY 10004-1012

<http://www.atsjournals.org>

[lvay@thoracic.org](mailto:lvay@thoracic.org)

Phone: 212-315-6440

---

**From:** Tribuna, Stephanie C. [mailto:STRIBUNA@PARTNERS.ORG]

**Sent:** Friday, September 05, 2014 2:03 PM

**To:** ATS Permission Requests

**Subject:** RE: Permission request

Thank you. Yes, I will complete the form and proceed.

Steph

---

**From:** Lan Vay [mailto:lvay@thoracic.org] **On Behalf Of** ATS Permission Requests

**Sent:** Friday, September 05, 2014 2:01 PM

**To:** Tribuna, Stephanie C.

**Subject:** RE: Permission request

Hello Stephanie,

Thank you for your interest in the American Thoracic Society journals. The cost for usage of the requested materials is \$200.

Attached you will find our Permission Request form. If you wish to proceed, please fill it out and include your form of payment.

Upon receipt and completion of payment, you will be notified of the approval of your request.

Best,

**Alan Vay**  
Journal Program Coordinator  
American Thoracic Society  
25 Broadway, 18th Floor  
New York, NY 10004-1012  
<http://www.atsjournals.org>

[vay@thoracic.org](mailto:vay@thoracic.org)  
Phone: 212-315-6440

---

**From:** Tribuna, Stephanie C. [<mailto:STRIBUNA@PARTNERS.ORG>]  
**Sent:** Friday, September 05, 2014 1:47 PM  
**To:** ATS Permission Requests  
**Cc:** Maron, Bradley A.,M.D.; Leopold, Jane A.,M.D.  
**Subject:** Permission request

Attn: Diane Gern

Dear Ms. Gern:

Drs. Maron and Leopold request permission to use Figures 3 (panel A) and 6 (panels A and B) from the following publication:

Dysregulated renin-angiotensin-aldosterone system contributes to pulmonary arterial hypertension. de Man, F.S., et al. Am J Respir Crit Care Med 2012;186(8):780-789. Figure 3 is on page 784; Figure 6 is on page 786.

The authors have created a new work that has been accepted for publication:

Maron, A.B., and Leopold, J.A. Emerging Concepts in the Molecular Basis of Pulmonary Arterial Hypertension (PAH): Part II: Neurohormonal Signaling Contributes to the Pulmonary Vascular-right Ventricular Pathophenotype of PAH. To be published in: Circulation, published by Lippincott Williams and Wilkins. The anticipated publication date will be sometime this month, or early October.

Dr. Maron's email address is: [bmaron@partners.org](mailto:bmaron@partners.org)

Dr. Leopold's email address is: [jleopold@partners.org](mailto:jleopold@partners.org)

Please let us know if you have any questions. Thank you.

Sincerely,

Stephanie Tribuna  
Executive Assistant to Dr. Joseph Loscalzo  
Brigham & Women's Hospital  
VRB, 77 Avenue Louis Pasteur, Rm 630H  
Boston, MA 02115  
317-525-4833  
317-525-4830 (fax)  
Email: [stribuna@partners.org](mailto:stribuna@partners.org)

The information in this e-mail is intended only for the person to whom it is addressed. If you believe this e-mail was sent to you in error and the e-mail contains patient information, please contact the Partners Compliance HelpLine at <http://www.partners.org/complianceline> . If the e-mail was sent to you in error but does not contain patient information, please contact the sender and properly dispose of the e-mail.
